---

# Erratum

Ametov AS, Barinov A, Dyck PJ, Hermann R, Kozlova N, Litchy WJ, Low PA, Nehrdich D, Novosadova M, O'Brien PC, Reljanovic M, Samigullin R, Schuette K, Stokov I, Tritschler HJ, Wessel K, Yakhno N, Ziegler D, for the SYDNEY Trial Study Group: The sensory symptoms of diabetic polyneuropathy are improved with  $\alpha$ -lipoic acid: the SYDNEY Trial. *Diabetes Care* 26:770–776, 2003

In the above-listed article, the last sentence of the last paragraph of the RESULTS section should read: “The HbA<sub>1c</sub> of the ALA group had improved by a mean value of 0.16%, whereas the placebo group had improved by a mean value of 0.22% ( $P = \text{NS}$ ).”
